# Supplementary material
Source: publisher figshare collection journal article supplement (https://acs.figshare.com/ndownloader/files/3817825)
Supplement: Supplementary file 1 [file 3817825]

# Supporting information

## Directional Fano Resonance in a Silicon Nanosphere Dimer

Jiahao Yan, Pu Liu, Zhaoyong Lin, Hao Wang, Huanjun Chen, Chengxin Wang &

Guowei Yang

*State Key Laboratory of Optoelectronic Materials and Technologies, Institute of Optoelectronic and Functional Composite Materials, Nanotechnology Research Center, School of Physics & Engineering, Sun Yat-sen University, Guangzhou 510275, Guangdong, P. R. China*

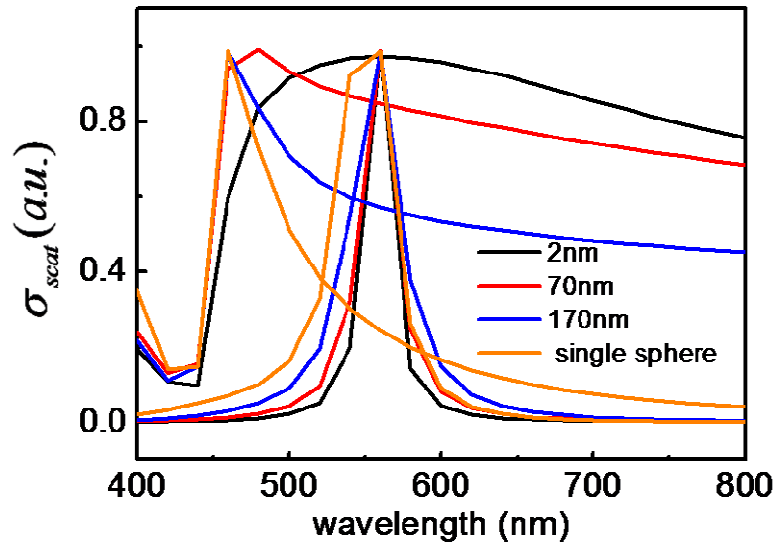

**Figure S1.** The scattering cross sections contributed by magnetic dipole mode (peak near 550 nm) and electric dipole mode when altering the gap distance.

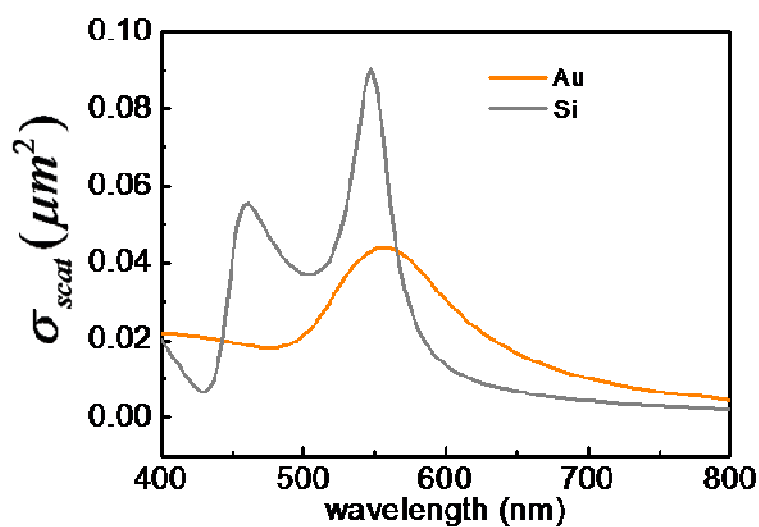

Figure S2. Calculated scattering cross sections of a individual 130 nm silicon sphere and a gold sphere with the same size.

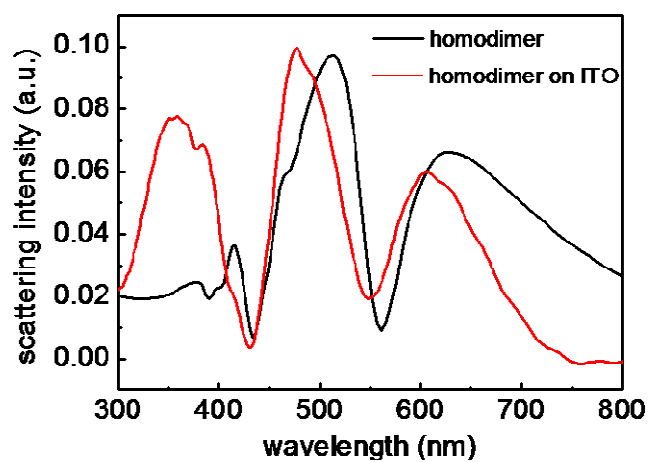

Figure S3. Calculated backward scattering spectra of a heterodimer supported on ITO substrate. The diameters of silicon spheres are 110 nm and 130 nm. The refractive index of ITO substrate is set to 1.6.
